# Supplementary material for: Learning from registries in pulmonary arterial hypertension: pitfalls and recommendations
Source: PubMed Central journal article supplement — Eur Respir Rev. 2019 Dec 18;28(154):190050. doi: 10.1183/16000617.0050-2019 (PMC9488628; doi:10.1183/16000617.0050-2019), 2019-12-18
Supplement: Supplementary_material_table_S1.pdf [file Supplementary_material_table_S1.pdf]

**TABLE S1: Treatment practices in incident patients with Pulmonary Arterial Hypertension within three months following the diagnostic assessment**

|                              | <i>Kylhammar</i> |        |      | <i>Hoeper</i> |        |      | <i>Boucly</i>   | <i>Hurdman</i> |
|------------------------------|------------------|--------|------|---------------|--------|------|-----------------|----------------|
|                              | Swedish registry |        |      | COMPERA       |        |      | French registry | ASPIRE         |
| <b>Patients,n</b>            | 530              |        |      | 1588          |        |      | 1017            | 598            |
| <b>Data collection</b>       | 2008-2016        |        |      | 2009-2016     |        |      | 2006-2016       | 1998-2006      |
| <b>Therapy at risk level</b> |                  |        |      |               |        |      |                 |                |
|                              | Low              | Interm | High | Low           | Interm | High | -               | -              |
| No treatment                 | 6                | 3      | 2    | 0             | 0      | 0    | 3               | 11             |
| CCB                          | 6                | 5      | 4    | 9             | 4      | 1    | 7               | 2              |
| ERA                          | 57               | 48     | 27   | 43            | 36     | 45   | 30              | -              |
| PDE5i/sGC                    | 24               | 26     | 18   | 63            | 72     | 78   | 15              | -              |
| PGI2                         | 0                | 1      | 4    | 1             | 2      | 7    | 2               | 10             |
| Combination therapy          | 6                | 15     | 44   | 19            | 14     | 27   | 43              | 28             |

Data are presented as frequencies. ASPIRE = Assessing the Spectrum of Pulmonary hypertension Identified at a Referral centre; CCB = Calcium channel blockers; COMPERA = Comparative, Prospective Registry of Newly Initiated Therapies for Pulmonary Hypertension; ERA = Endothelium receptor blockers; PDE5I = Phosphodiesterase type 5 inhibitors; soluble guanylate cyclase; PGI<sub>2</sub> = prostaglandine inhibitor type 2.

Patients are categorized as 'Low risk', 'Intermediate risk', or 'High risk' according to cut-off values for FC, 6MWD, NT-proBNP, right atrial area, mean right atrial pressure, pericardial effusion, CI, and S<sub>v</sub>O<sub>2</sub> defined in the risk assessment instrument from the 2015 guidelines. These guidelines recommend that patients with low or intermediate risk first receive either oral monotherapy or oral. Patients with high risk are recommended to receive initial combination therapy including intravenous prostacyclin.
